# Supplementary material
Source: Springer Nature journal article supplement (https://www.springermedizin.de/resource/supplementary/12967_2013_1727_MOESM10_ESM.pdf/9575140)

a) Controls

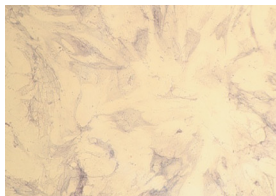

b) PL-3

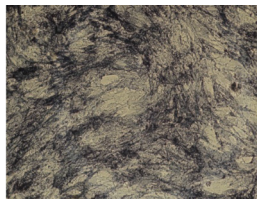

c) PI-PL3

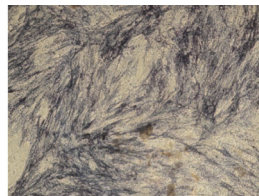

2

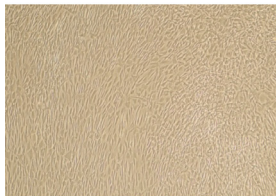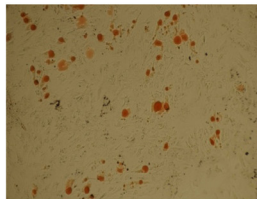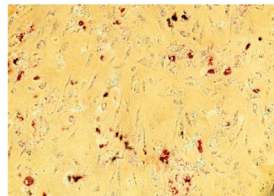

3

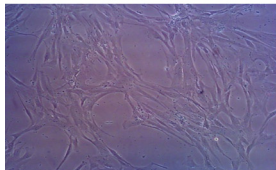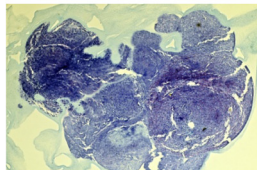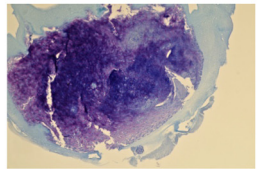

Supplement: MOESM10 [file 9575140]
